# Supplementary material for: Controlled synthesis of CdS micro/nano leaves with (0001) facets exposed: enhanced photocatalytic activity toward hydrogen evolution
Source: Royal Society of Chemistry journal article supplement (doi:10.1039/c2jm35415b), 2012-01-01
Supplement: c2jm35415b.pdf [file c2jm35415b.pdf]

## Supporting Information

### **Controlled Synthesis of CdS Micro/nano Leaves with (0001) Facets Exposed: Enhanced Photocatalytic Activity Toward Hydrogen Evolution**

*Cuixia Li,<sup>†,‡</sup> Lijun Han,<sup>†</sup> Rongji Liu,<sup>†,‡</sup> Honghua Li,<sup>†</sup> Suojiang Zhang,<sup>\*,†</sup> and  
Guangjin Zhang<sup>\*,†</sup>*

<sup>†</sup>Beijing Key Laboratory of Ionic Liquids Clean Process, State Key Laboratory of Multiphase  
Complex System, Key Laboratory of Green Process and Engineering, Institute of Process  
Engineering, Chinese Academy of Sciences, Beijing 100190, P.R. China

<sup>‡</sup>College of Chemistry and Chemical Engineering, Graduate University of Chinese Academy  
of Sciences, Beijing 100049, P.R. China

**\*Corresponding Author**

E-mail: [sjzhang@home.ipe.ac.cn](mailto:sjzhang@home.ipe.ac.cn); [zhanggj@home.ipe.ac.cn](mailto:zhanggj@home.ipe.ac.cn)

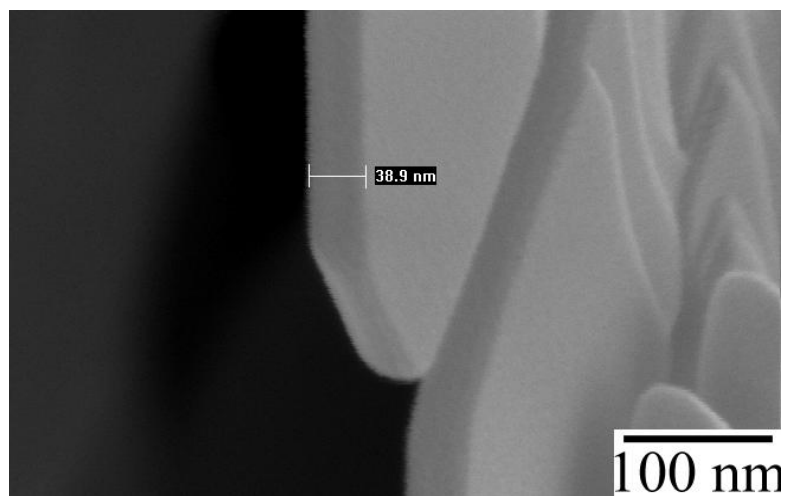

**Figure S1.** High-magnification SEM image of the CdS micro/nano leaves shown in Figure 1.

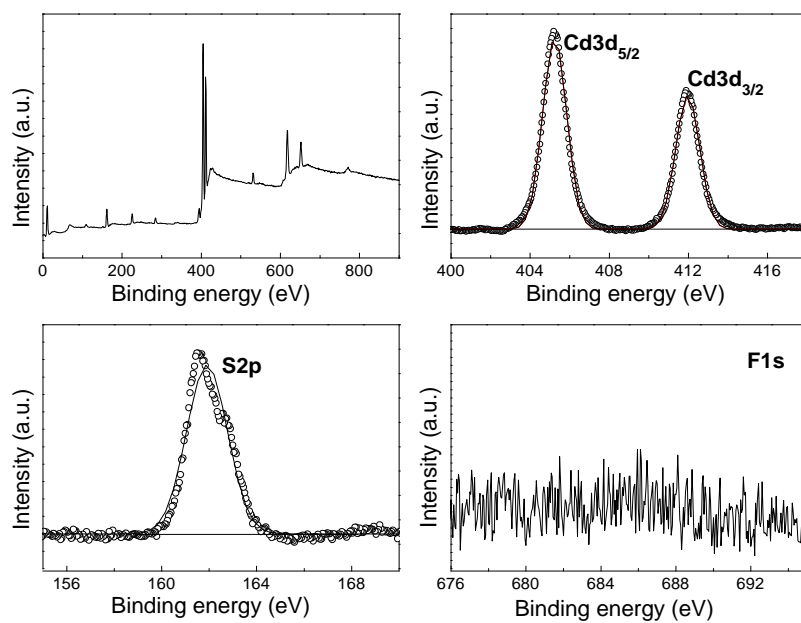

**Figure S2.** XPS patterns of the CdS dendrite shown in Figure 1. a) Survey spectrum. b-d) High-resolution spectra of Cd 3d<sub>5/2</sub> and Cd 3d<sub>3/2</sub>, S 2p, F 1s.

The peaks of XPS spectra appeared at 405.1, 412.0, and 161.9 eV were corresponding to C 3d<sub>5/2</sub>, Cd 3d<sub>3/2</sub> and S 2p, respectively. The F 1s peak was not found. This confirms that the product was pure CdS.

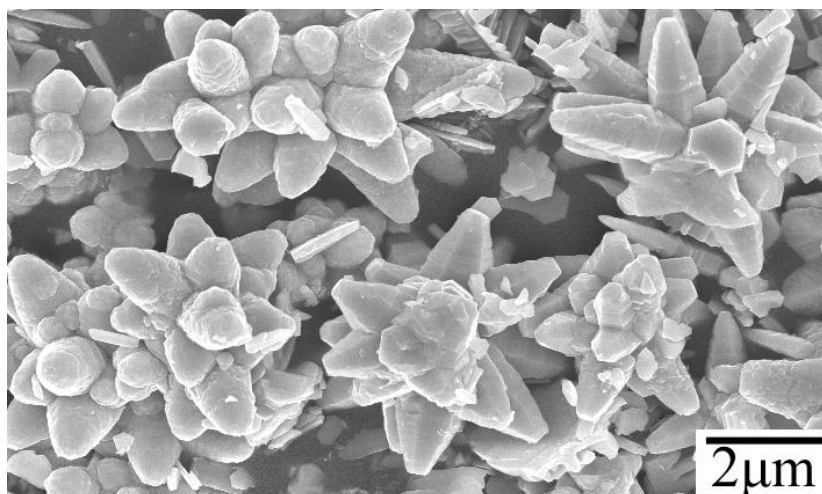

**Figure S3.** SEM image of CdS sample synthesized at 200 °C for 20 h under the concentration of 0.200 M of NH<sub>4</sub>F, 0.0625 M of cadmium acetate and 0.075 M of thiourea.

**Table S1.** Specific surface area and photocatalytic activity of CdS samples ((a)-(d) were the same samples with Figure 2 a-d).

| Samples   | Specific surface area<br>(m <sup>2</sup> g <sup>-1</sup> ) | H <sub>2</sub> generation rate<br>(μmolh <sup>-1</sup> ) |
|-----------|------------------------------------------------------------|----------------------------------------------------------|
| (a)       | 0.9                                                        | 119.0                                                    |
| (b)       | 3.6                                                        | 468.4                                                    |
| (c)       | 5.4                                                        | 740.9                                                    |
| (d)       | 3.8                                                        | 192.8                                                    |
| Figure S4 | 12.8                                                       | 45.9                                                     |

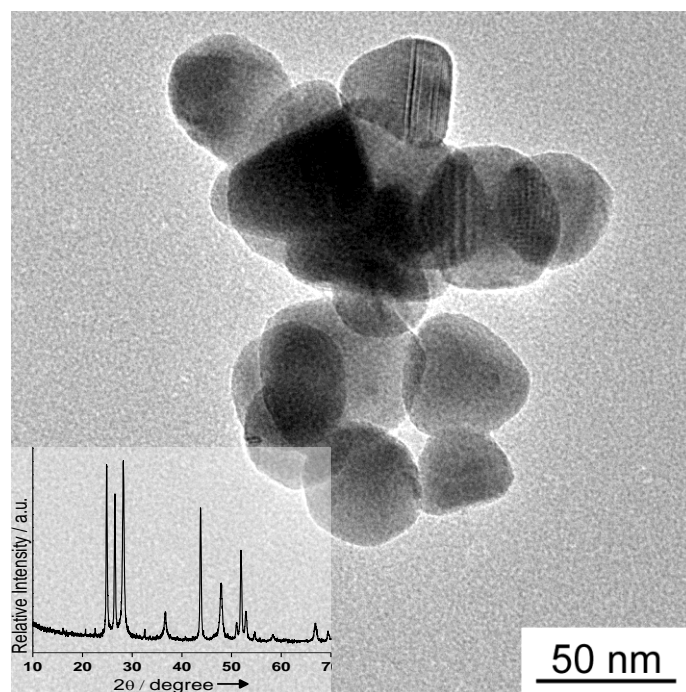

**Figure S4.** TEM image and XRD pattern of CdS nanoparticles.

**The CdS nanoparticles were prepared as follows:** an aqueous solution of Na<sub>2</sub>S (533 ml, 0.14 M) was added slowly to Cd(CH<sub>3</sub>COO)<sub>2</sub> solution (667 ml, 0.14 M) under vigorous stirring. The yellow mixture was stirred for 24 h and kept for an additional 24 h. The resulting yellow slurry was filtered. The wet solid was suspended in pure water (80 ml) and transferred to a 100 ml Teflon autoclave and heated at 200 °C for 72 h. The precipitate obtained was filtered and washed several times with water and absolute ethanol, and dried under vacuum at 95 °C for 24 h.
